# Supplementary material for: 1q jumping translocation as a biomarker in myeloid malignancy: frequently mutated genes associated with bad prognosis and low survival
Source: PubMed Central journal article supplement (PMC11295323; doi:10.1186/s40164-024-00541-3), 2024-08-01
Supplement: 40164_2024_541_MOESM1_ESM.pdf [file 40164_2024_541_MOESM1_ESM.pdf]

Supplemental Tables S1-S3

Supplemental Table S1: Jumping translocations (JT) in patients with myeloid malignancies

| Sample ID                                | Pt. ID | Disease       | Age/<br>Sex | JT event               | Time to the first<br>1q JT event<br>(days) | Recipient chromosomes involved in JT    |                                                 |                                   | Extra<br>chromosomal<br>abnormalities<br>besides JT |    |
|------------------------------------------|--------|---------------|-------------|------------------------|--------------------------------------------|-----------------------------------------|-------------------------------------------------|-----------------------------------|-----------------------------------------------------|----|
|                                          |        |               |             | + JT,<br>- JT          |                                            | P-arms of<br>acrocentric<br>chromosomes | Telomeric regions /<br>other genomic<br>regions | Centromeric<br>(peri-)<br>regions |                                                     |    |
| <b>Classic 1q-JT cases (case # 1-39)</b> |        |               |             |                        |                                            |                                         |                                                 |                                   |                                                     |    |
| 1                                        | 1*     | MDS           | 76/M        | +                      | 1                                          |                                         | 2qter; 18qter                                   | 16q11.1                           | der(18)t(9;18)(q13;q23)                             |    |
|                                          |        |               |             | -(After<br>transplant) | 256, 640, 2253                             |                                         |                                                 |                                   |                                                     |    |
| 2                                        | 2*     | MDS -><br>AML | 66/M        | +                      | 2376                                       |                                         |                                                 | 16q11.1                           |                                                     |    |
| 3                                        |        |               |             | -                      | -3402, -3037, -2672, ...-847               |                                         |                                                 |                                   |                                                     |    |
| 4                                        |        |               |             | -                      | -273                                       | 14p                                     |                                                 |                                   |                                                     |    |
| 5                                        |        |               |             | +                      | 1                                          | 13p; 14p; 21p                           |                                                 |                                   |                                                     |    |
| 6-9                                      |        |               |             | +                      | 406                                        | 13p; 14p                                |                                                 |                                   |                                                     |    |
| 10                                       | 3      | MDS           | 88/M        | +                      | 636, 749, 962, 1344                        | 13p; 14p; 21p                           |                                                 | Yq11.1                            |                                                     |    |
| 11-12                                    | 4      | AML           | 77/F        | -                      | 1                                          | 13p                                     | 7qter                                           |                                   |                                                     |    |
| 13-14                                    |        |               |             | -                      | -1013, -714                                |                                         |                                                 |                                   |                                                     |    |
| 15                                       | 5      | MDS           | 79/F        | -                      | 1, 126                                     | 14p; 15p; 21p                           |                                                 |                                   |                                                     |    |
| 16                                       |        | AML           |             | -                      | -105                                       |                                         |                                                 |                                   |                                                     |    |
| 17                                       | 6      | MDS           | 79/M        | +                      | 1                                          | 13p; 22p                                |                                                 |                                   | r(7)                                                |    |
| 18                                       |        |               |             | -                      | -600                                       |                                         |                                                 |                                   |                                                     |    |
| 19                                       |        |               |             | +                      | 1                                          | 15p; 21p                                |                                                 | 16q11.1                           | der(16;21)(q10;q10)                                 |    |
| 20                                       | 7      | AML           | 81/M        | +                      | 230                                        | 15p; 21p                                |                                                 |                                   |                                                     |    |
| 21                                       |        |               |             | +                      | 1                                          | 13p; 21p                                | 7qter                                           |                                   |                                                     |    |
| 22                                       | 8      | AML           | 75/M        | +                      | 814                                        | 13p; 21p                                | 7qter                                           |                                   | +r                                                  |    |
| 23                                       |        |               |             | -                      | -1702                                      |                                         |                                                 |                                   |                                                     |    |
| 24                                       |        |               |             | -                      | -1586                                      |                                         |                                                 |                                   |                                                     | +8 |
| 25                                       |        |               |             | -                      | -1450                                      |                                         |                                                 |                                   |                                                     | -Y |
| 26-29                                    | 9      | AML           | 64/F        | +                      | 1                                          | 15p                                     |                                                 | 16q11.1                           | add(14)(p11.2),<br>der(14;15)(q10;q10)              |    |
| 30                                       |        |               |             | -                      | -954, -922, -828, -587                     |                                         |                                                 |                                   |                                                     |    |
| 31                                       |        |               |             | +                      | 1                                          | 15p; 21p; 22p                           |                                                 |                                   | t(12;19)(q24.1;q13.3)<br>del(12)(q22q24.1)          |    |
| 32-33                                    | 10     | AML           | 80/F        | +                      | 215                                        | 15p; 21p                                |                                                 |                                   | t(12;19)(q24.1;q13.3)<br>del(12)(q22q24.1)          |    |
| 34, 35                                   |        |               |             | -                      | -315, -234                                 |                                         |                                                 |                                   |                                                     |    |
| 36                                       | 11     | AML           | 86/F        | -                      | -1333                                      |                                         |                                                 |                                   |                                                     |    |
| 37-39                                    |        |               |             | +                      | 1, 111, 826                                | 14p; 15p; 22p                           |                                                 |                                   | +8                                                  |    |
| 40                                       |        |               |             | +                      | 584                                        | 14p; 15p                                |                                                 |                                   | +8                                                  |    |
| 41                                       | 12     | AML           | 73/M        | +                      | 1                                          | 13p; 21p                                |                                                 |                                   | -Y                                                  |    |
| 42, 43                                   | 13     | AML           | 62/M        | -                      | -275, -166                                 |                                         |                                                 |                                   | +3,del(9)(q13q22)                                   |    |
| 44                                       |        |               |             | +                      | 1                                          | 14p; 15p                                |                                                 |                                   | +3,+de(8)(q21),<br>del(9)(q13q22),+mar              |    |
| 45                                       | 14     | AML           | 67/F        | -                      | -1248                                      |                                         |                                                 |                                   |                                                     |    |
| 46                                       |        |               |             | +                      | 1                                          | 13p; 14p; 22p                           |                                                 |                                   | inv(1)(p13q21)                                      |    |
| 47                                       | 15*    | MPN           | 46/F        | +                      | 1                                          | 13p; 14p                                |                                                 |                                   |                                                     |    |
| 48                                       |        |               |             | +                      | 230                                        | 14p                                     |                                                 |                                   |                                                     |    |
| 49                                       | 16     | AML           | 85/M        | +                      | 1                                          |                                         | 1pter; 18pter                                   |                                   |                                                     |    |
| 50                                       |        |               |             | +                      | 417                                        |                                         | 1pter; 18qter                                   |                                   | add(18)(q22)                                        |    |
| 51                                       | 17     | AML           | 73/F        | -                      | -22                                        | 22p                                     |                                                 |                                   | del(11)(q13q23)                                     |    |
| 52                                       |        |               |             | +                      | 1                                          | 15p; 22p                                |                                                 |                                   |                                                     |    |
| 53-54                                    | 18     | AML           | 79/F        | -                      | -1203, -1133                               |                                         |                                                 |                                   |                                                     |    |
| 55                                       |        |               |             | +                      | 1                                          | 13p; 15p                                |                                                 |                                   |                                                     |    |
| 56                                       | 19     | MDS           | 75/F        | +                      | 1                                          | 14p; 22p                                | 18qter                                          |                                   | +8                                                  |    |
| 57-58                                    | 19     |               |             | +                      | 1650, 1776                                 | 14p; 21p; 22p                           | 18qter                                          |                                   | add(18)(q12)                                        |    |
| 59-61                                    | 20     | AML           | 69/M        | +                      | 1, 300, 372                                | 13p, 15p                                |                                                 | 16q11                             |                                                     |    |
| 62                                       | 21     | AML           | 63/M        | -                      | -448                                       |                                         |                                                 |                                   | t(4;8)(q12;q24), +8                                 |    |
| 63                                       |        |               |             | +                      | 1                                          | 15p, 21p, 22p                           |                                                 |                                   |                                                     |    |

|         |    |                    |      |             |                                |                       |                            |                          |                                          |                                     |
|---------|----|--------------------|------|-------------|--------------------------------|-----------------------|----------------------------|--------------------------|------------------------------------------|-------------------------------------|
| 64      | 22 | MDS->AML           | 68/M | +           | 1                              | 13p, 14p, 15p         |                            |                          | +8, +11, +13 from non-JT clones          |                                     |
| 65      | 23 | MDS                | 81/F | -           | -1505                          |                       |                            |                          | del(6)(q13q23)                           |                                     |
| 66-72   |    | AML                |      | +           | 1, 29, 113, 155, 184, 634, 686 | 13p; 14p; 15p; 22p    |                            |                          | del(6)(q13q23) from non-JT clones        |                                     |
| 73      | 24 | CMML               | 65/M | -           | -490                           |                       |                            |                          |                                          |                                     |
| 74-79   |    | AML                |      | +           | 1, 34, 70, 98, 169, 188        | 13p; 14p; 15p; 21p    | 4qter                      | 9q12; 16p10; 18q10; Yq12 |                                          |                                     |
| 80      | 25 | AML                | 90/M | -           | -874                           |                       |                            |                          |                                          |                                     |
| 81-82   |    | +                  |      | 1, 15       | 13p; 14p; 15p; 21p             | / 2p23                |                            | Yq12                     | del(1)(q32q42)                           |                                     |
| 83      | 26 | AML                | 70/M | -           | -1435                          |                       |                            |                          | +mar                                     |                                     |
| 84-85   |    | +                  |      | 1, 87       | 14p                            |                       |                            | 7p10                     | dup(1)(q12q44) from non-JT clones        |                                     |
| 86      | 27 | MPN -> blast phase | 67/F | -           | -7539                          |                       |                            |                          | +8,del(20)(q11.2)                        |                                     |
| 87-88   |    | +                  |      | 1, 330      | 13p; 15p; 22p                  | 8pter; 17pter         |                            | 20p11                    | +8,del(20)(q13.1)                        |                                     |
| 89      | 28 | CMML               | 82/M | -           | -1203                          |                       |                            |                          |                                          |                                     |
| 90      |    | AML                |      | +           | 1                              | 14p; 15p              |                            | 9p10                     | der(Y)t(Y;9)(q11.23;q13), add(14)(p11.2) |                                     |
| 91      | 29 | MDS                | 64/M | +           | 1, 64, 202, 264                | 14p                   |                            | 7p10; 19p10              | +9,+21,del(1)(p13)                       |                                     |
| 92      | 30 | CMML               | 65/M | -           | -349                           |                       |                            |                          |                                          |                                     |
| 93-94   |    | AML                |      | +           | 1, 123                         | 14p; 15p              | Yqter                      | 9q12; 16p10              | del(6)(q15q21), der(Y)t(Y;9)(q12;q12)    |                                     |
| 95      | 31 | MDS                | 65/M | -           | -545                           |                       |                            |                          | +8,+19                                   |                                     |
| 96-98   |    | +                  |      | 1, 390, 484 | 13p; 14p; 21p                  |                       |                            |                          | +8,+19                                   |                                     |
| 99      | 32 | MDS                | 60/M | +           | 1                              | 13p; 15p; 21p         | 4qter                      |                          |                                          |                                     |
| 100     | 33 | MPN                | 45/M | -           | -1985                          |                       |                            |                          |                                          |                                     |
| 101-102 |    | +                  |      | 1, 606      | 15p                            |                       |                            | 7p10; 9p10               |                                          |                                     |
| 103     | 34 | MDS                | 75/M | -           | -700                           |                       |                            |                          |                                          |                                     |
| 104-105 |    | +                  |      | 1, 94       | 13p                            | 18qter                |                            | Yq11; 12p11; 16q11       |                                          |                                     |
| 106     | 35 | AML                | 69/M | -           | -204                           |                       |                            |                          |                                          |                                     |
| 107-108 |    | +                  |      | 1, 49       | 15p                            | 7pter; 9qter          |                            |                          |                                          |                                     |
| 109     | 36 | T-MDS              | 64/F | -           | -832                           | 21p                   |                            |                          | t(10;21)(q25;q11.2)                      |                                     |
| 110     |    | T-MDS              |      | +           | 1                              | 13p; 21p              | / 3p25                     |                          |                                          | t(3;10;21)(q27;q25;q22)             |
| 111     |    | AML                |      | +           | 64                             | 13p; 14p; 21p         | 7qter / 3p25; 6q26, 18q22  |                          |                                          | t(3;10;21)(q27;q25;q22),            |
| 112     |    | AML                |      | +           | 108                            | 13p; 14p; 21p         | / 3p25                     |                          |                                          | t(3;10;21)(q27;q25;q22)             |
| 113     |    | AML                |      | +           | 143                            | 13p; 14p; 21p         | 3p25                       |                          |                                          | t(3;10;21)(q27;q25;q22) del(7)(p12) |
| 114     | 37 | MDS                | 66/M | -           | -1592                          |                       |                            |                          |                                          |                                     |
| 115     |    | +                  |      | 1           |                                | 5qter / 4q31.3; 18q21 |                            | 16p10                    |                                          |                                     |
| 116     | 38 | MDS                | 43/M | -           | -385                           |                       |                            |                          |                                          |                                     |
| 117     |    | AML                |      | +           | 1                              |                       | 6pter / 7q22; 10q22, 12q15 |                          | Yp11                                     |                                     |
| 118-119 | 39 | MDS                | 57/F | +           | 1, 180                         | 13p, 14p, 21p, 22p    | / 11q23, 18q21.1           | 5p11                     | del(6)(q13),-9,+mar, del(7)(p21),-13,-22 |                                     |

**Non 1q-JT cases (case #40-46)**

|         |    |            |      |         |                                              |   |                                                |                        |                                                             |
|---------|----|------------|------|---------|----------------------------------------------|---|------------------------------------------------|------------------------|-------------------------------------------------------------|
| 120     | 40 | AML        | 62/F | -       | -554                                         |   |                                                |                        | +del(1)(p13),-3,-18,+3-4mar                                 |
| 121     |    | AML w/ MRC |      | +       | (1q25)                                       | 1 | 5qter, 6pter, 17qter                           |                        |                                                             |
| 122     | 41 | AML        | 63/F | -       | -42                                          |   |                                                |                        | der(3)inv(3)(p25q13.2)inv(3)(q21 q26), del(5)(q13q33)+8,+13 |
| 123     |    | AML w/ MRC |      | +       | (1p22)                                       | 1 | 11pter / 3q21; 5q13                            |                        |                                                             |
| 124     | 42 | CMML       | 80/F | -       | -644                                         |   |                                                |                        |                                                             |
| 125     |    | AML        |      | +       | (3q21)                                       | 1 | 21p                                            | 9qter; 20qter / Xp22.1 |                                                             |
| 126     | 43 | AML        | 32/M | -       | -152                                         |   |                                                |                        |                                                             |
| 127-129 |    | +          |      | (7p15)  | 1, 39, 80                                    |   | 1qter; 9qter; 12qter; 13qter. 16pter / 15q26.1 |                        |                                                             |
| 130     | 44 | AML        | 33/M | -       | -337                                         |   |                                                |                        |                                                             |
| 131     |    | +          |      | (12p13) | 1                                            |   | / 1p13; 7p15; 10q22; 12q13                     |                        |                                                             |
| 132     | 45 | AML        | 72/M | -       | -253                                         |   |                                                |                        |                                                             |
| 133-142 |    | +          |      | (15q21) | 1, 36, 94, 157, 192, 194, 228, 241, 261, 291 |   | 14qter, 6pter, 6qter, / 3p25, 15q24            |                        |                                                             |
| 143     | 46 | AML        | 46/F | -       | -256                                         |   |                                                |                        |                                                             |
| 144     |    | +          |      | (21q22) | 1                                            |   | 10qter                                         | 16p11; 17q11; 18p11    |                                                             |

Case #1-39 were classic 1q-JT cases and case #40-46 were non 1q-JT cases. AML: acute myeloid leukemia; AML w/MRC: acute myeloid leukemia with myelodysplasia related changes; CMML: chronic myelomonocytic leukemia; F: female; JT: jumping translocation; M: male;

MDS: myelodysplastic syndrome; MPN: myeloproliferative neoplasm; pt.: patient; T-MDS: treatment-related myelodysplastic syndrome; ter: terminal end of chromosome

**Table S2: mutations/variants in 45 genes among 1q-JT patients**

| Genes (n = 45)                  | Mutations / Variants (number of patients)                                                                                                         |
|---------------------------------|---------------------------------------------------------------------------------------------------------------------------------------------------|
| <i>KMT2D.chr12</i>              | p.P998T, p.R2188C, p.P2210L, p.S4073L, p.Q3475_H3476insQ                                                                                          |
| <i>IDH2.chr15</i>               | p.R140Q (3)                                                                                                                                       |
| <i>SRSF2.chr17</i>              | p.P95L (3), p.P95R (2), p.P95H                                                                                                                    |
| <i>RUNX1.chr21</i>              | p.R166*, p.R169T, p.D198N, p.R204*, p.R320*, p.E422A                                                                                              |
| <i>STAG2.chrX</i>               | p.A350fs, c.463-1G>C, p.L591fs, p.R1012*, c.1018-1G>C, p.S1058*                                                                                   |
| <i>BCOR.chrX</i>                | p.R1341W, p.I730fs, p.R1234G, p.L1157fs                                                                                                           |
| <i>ASXL1.chr20</i>              | p.E797fs, p.G646fs (3), p.L815Q, p.A627fs, p.P699fs, p.E635fs (2), p.R693*                                                                        |
| <i>NRAS.chr1</i>                | p.G12D, p.G12C, p.G13R                                                                                                                            |
| <i>IDH1.chr2</i>                | p.R132H, p.R132C, p.R119P                                                                                                                         |
| <i>GATA2.chr3</i>               | p.M388_E391delinsI, p.S261fs, p.M388_K389del                                                                                                      |
| <i>SGK1.chr6</i>                | p.P295L                                                                                                                                           |
| <i>RECQL4.chr8 **</i>           | c.2297-1C>G (2), p.G556D, p.K141T                                                                                                                 |
| <i>NUP98.chr11</i>              | p.S1067A, p.E948D                                                                                                                                 |
| <i>NLRP1.chr17</i>              | p.R308Q                                                                                                                                           |
| <i>TP53.chr17</i>               | p.Y163C, p.R282W, p.H233P                                                                                                                         |
| <i>EP300.chr22</i>              | p.L2393V, p.R580Q, p.P748R                                                                                                                        |
| <i>NSD1.chr5</i>                | p.V2618L, p.G1231E                                                                                                                                |
| <i>NOTCH1.chr9</i>              | p.H316P, p.A1343V                                                                                                                                 |
| <i>NOTCH2.chr1</i>              | p.V2075M (2)                                                                                                                                      |
| <i>CREBBP.chr16</i>             | p.G1305S                                                                                                                                          |
| <i>SF3B1.chr2</i>               | p.K700E (2)                                                                                                                                       |
| <i>TET2.chr4</i>                | p.C296*, p.N439fs, p.Q831*, p.Q916*, p.K959*, p.E1057fs, p.L1111fs, P1115fs, N1118fs, p.H1219fs, p.V1232fs, R1359G, p.R1440fs, p.W1847*, p.H1881L |
| <i>DNMT3A.chr2</i>              | p.G413fs, p.Y584*                                                                                                                                 |
| <i>CHEK2.chr22</i>              | c.444+1G>A                                                                                                                                        |
| <i>NF1.chr17</i>                | p.S361T, p.I679fs                                                                                                                                 |
| <i>JAK2.chr9</i>                | p.V617F (2)                                                                                                                                       |
| <i>CBL.chr11</i>                | p.C404Y                                                                                                                                           |
| <i>PTPN11.chr12</i>             | p.A72S                                                                                                                                            |
| <i>ETV6.chr12</i>               | p.K421fs, p.N85fs, p.K421*                                                                                                                        |
| <i>U2AF1;U2AF1L5.chr21</i>      | p.S34F, p.R156H (2), p.Q157P                                                                                                                      |
| <i>CARD11.chr7</i>              | p.S881G                                                                                                                                           |
| <i>KRAS.chr12</i>               | p.G12D, p.G12S, p.A146P                                                                                                                           |
| <i>CEBPA.chr19</i>              | p.K298E                                                                                                                                           |
| <i>KIT.chr4</i>                 | p.N410Y                                                                                                                                           |
| <i>RAD50.chr5</i>               | p.V315L                                                                                                                                           |
| <i>GNAS.chr20</i>               | p.T415_G423del, p.T415A, p.A436V                                                                                                                  |
| <i>EZH2.chr7</i>                | p.L671V                                                                                                                                           |
| <i>MPL.chr1</i>                 | p.Y591H                                                                                                                                           |
| <i>BORCS8-MEF2B;MEF2B.chr19</i> | p.P301L                                                                                                                                           |
| <i>PHF6.chrX</i>                | p.R76fs, p.I314T, p.G248D                                                                                                                         |
| <i>ZRSR2.chrX</i>               | p.C326G                                                                                                                                           |
| <i>ERBB2.chr17</i>              | p.R896H                                                                                                                                           |
| <i>SETBP1.chr18</i>             | p.P1091T                                                                                                                                          |
| <i>PLCG2.chr16</i>              | p.R1224H                                                                                                                                          |
| <i>DDX41.chr5</i>               | p.R525H                                                                                                                                           |

\*\*variants in the RECQL4 gene were of unknown clinical significance and germline.

**Table S3: SNP microarray and optical genome mapping data for cases with 1q jumping translocations**

| Case ID | Chr. | Region                       | SNP microarray data               |                    |             |             | OGM* |
|---------|------|------------------------------|-----------------------------------|--------------------|-------------|-------------|------|
|         |      |                              | Copy Number Abnormality           | Start              | Stop        | Size (bp)   |      |
| 2       | 1    | 1q21.1 to q44 (terminal)     | Gain                              | <b>144,906,508</b> | 249,218,992 | 104,312,484 | Yes  |
| 3       | 1    | 1q21.2 to q44 (terminal)     | Gain                              | <b>145,444,556</b> | 249,218,992 | 103,774,436 |      |
|         | 4    | 4q24                         | Loss (including <i>TET2</i> gene) | 105,986,597        | 106,390,734 | 404,137     |      |
|         | 19   | 19q12 to qter (terminal)     | CN-LOH                            | 29,901,465         | 59,097,160  | 29,195,695  |      |
| 7       | 1    | 1q21.1 to q44 (terminal)     | Gain                              | <b>144,853,079</b> | 249,218,992 | 104,365,913 |      |
|         | 22   | 22q11.1 to q13.33 (terminal) | CN-LOH                            | 16,114,244         | 51,511,392  | 35,397,148  |      |
| 8       | 1    | 1q21.1 to q44 (terminal)     | Gain**                            | <b>144,861,940</b> | 249,218,992 | 104,357,052 |      |
|         | 16   | 16q11.2 to q (whole arm)     | CN-LOH                            | 46,450,037         | 90,274,695  | 43,824,658  |      |
| 11      | 1    | 1q21.1 to q44 (terminal)     | Gain                              | <b>144,938,320</b> | 249,218,992 | 104,280,672 | Yes  |
|         | 8    | 8pter to qter                | Gain                              | Whole chromosome   |             | N/A         | Yes  |
| 16      | 1    | 1p36.33 to p36.22 (terminal) | Loss                              | 689,189            | 9,842,576   | 9,153,387   |      |
|         | 1    | 1q21.1 to q44                | Gain (3-4 Copies)                 | <b>145,394,955</b> | 249,218,992 | 103,824,037 |      |
|         | 18   | 18p11.32 (terminal)          | Loss                              | 13,034             | 2,228,201   | 2,215,167   |      |
|         | 21   | 21q11.2 to q22.3 (terminal)  | CN-LOH                            | 14,613,203         | 48,100,155  | 33,486,952  |      |

\* Optical Genome mapping revealed all copy number variants detected by SNP microarray. No additional structural variants involving chromosome 1 were observed. \*\*Gain without allelic imbalance in the BAF plot. Chr.: chromosome. All locations were based on the hg19 genome builder.

**Supplemental Figures S1-S5**

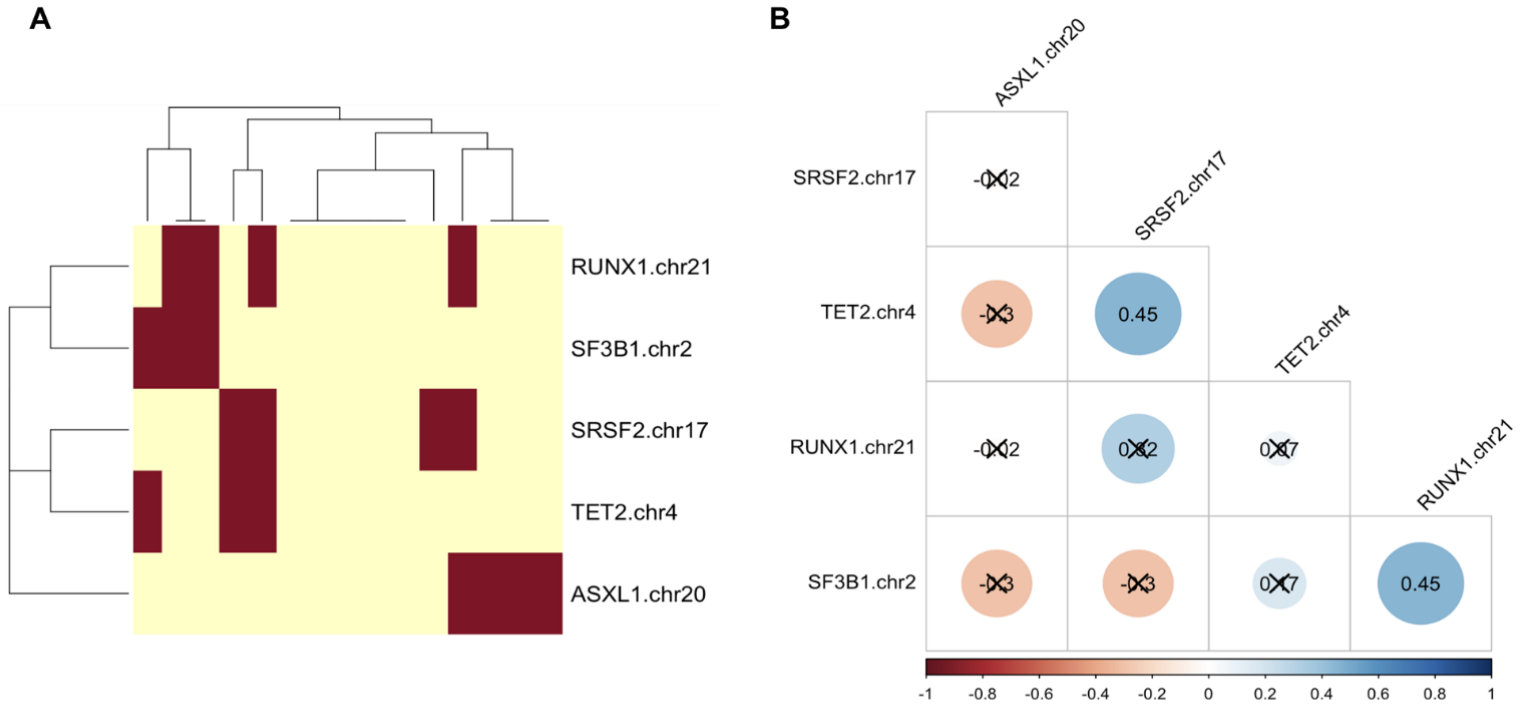

**Fig. S1** Mutation profiles of jumping translocations in the MD Anderson cohort. A. Heat map of the common mutated genes in this cohort. B. Correlations in the common mutated genes in this cohort. Numbers in circles indicate Pearson correlation coefficients.

**Treatment before jumping translocation identified**

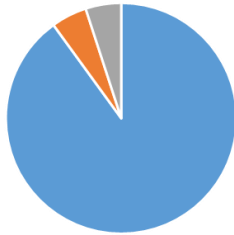

- Intensive treatment involving hypomethylating agents
- Intensive treatment without hypomethylating agents
- No treatment

**Stem cell transplant (SCT)**

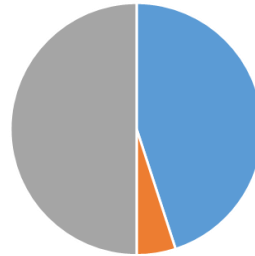

- With a success SCT
- With a failed SCT
- Without SCT

**Complete remission (CR1) and relapses**

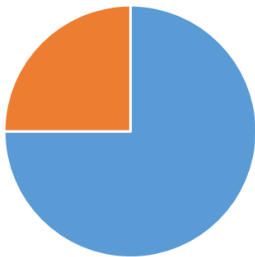

- CR1, relapse
- Resistant disease

**Treatment after jumping translocation identified**

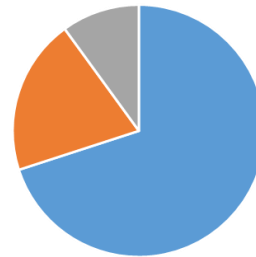

- Intensive treatment
- Salvage treatment
- No treatment

**Fig. S2** Treatment information of 1q-jumping translocation patients in this study.

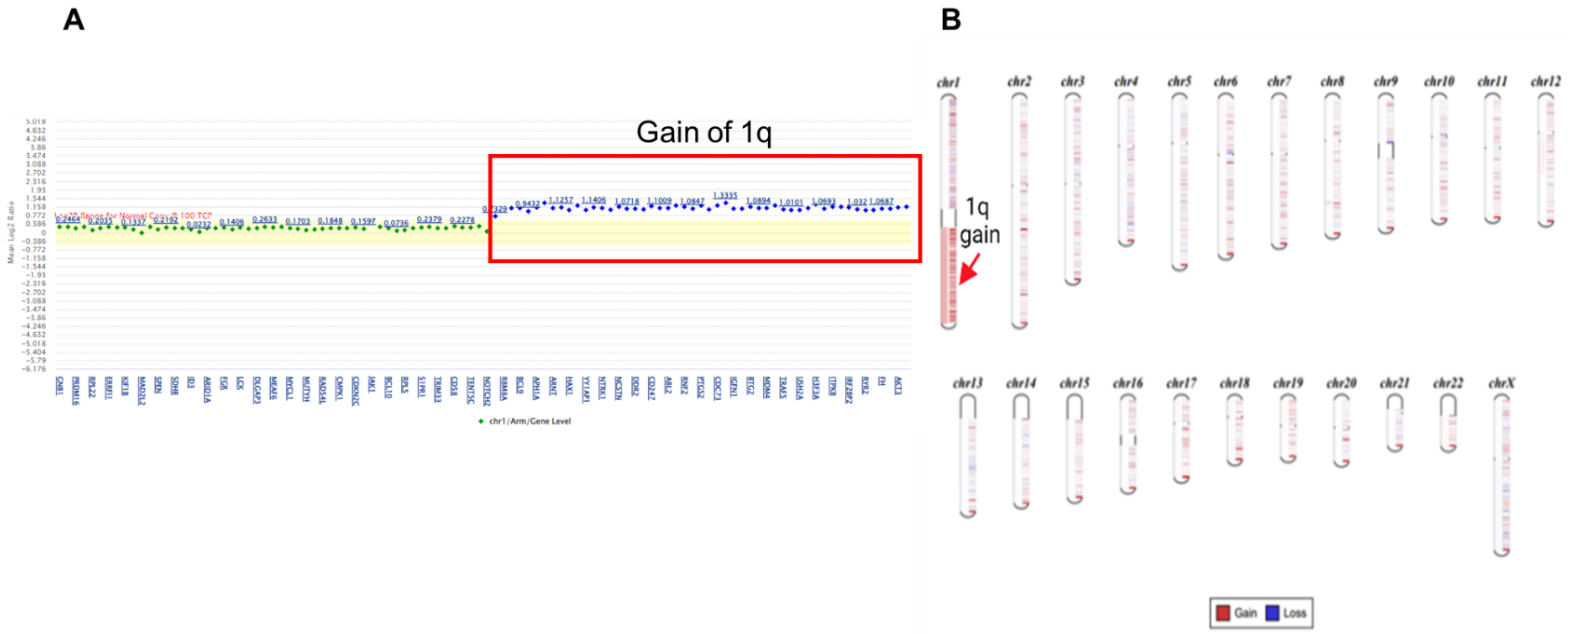

**Fig. S3** A. Diagram of copy number variants across entire chromosome 1 from the targeted next-generation sequencing assay to show gain of 1q (indicated by the red box). B. Diagram from CNVkit software version 0.9.6 shows gain of 1q. Red arrow points to the 1q gain.

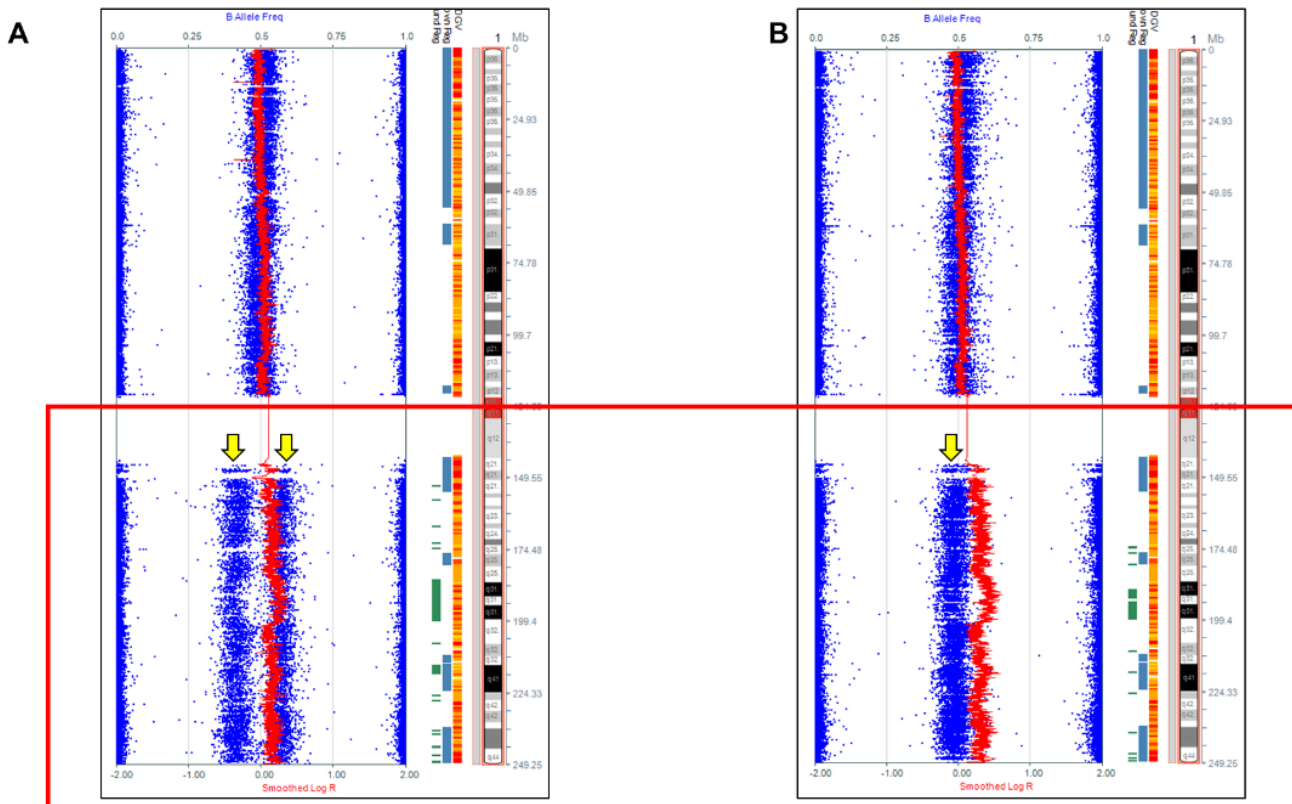

**Fig. S4** Characterization of 1q-JT by SNP microarray. A-B. Chromosomes 1 by SNP microarray. A. is from case 11 with allelic imbalance (yellow arrows), suggesting one of chromosomes 1 as the donor chromosome involved in 1q-JT formation. B. is from case 8 without allelic imbalance (yellow arrow) suggesting both homologues chromosomes 1 as donor chromosomes involved in 1q-JT formation.

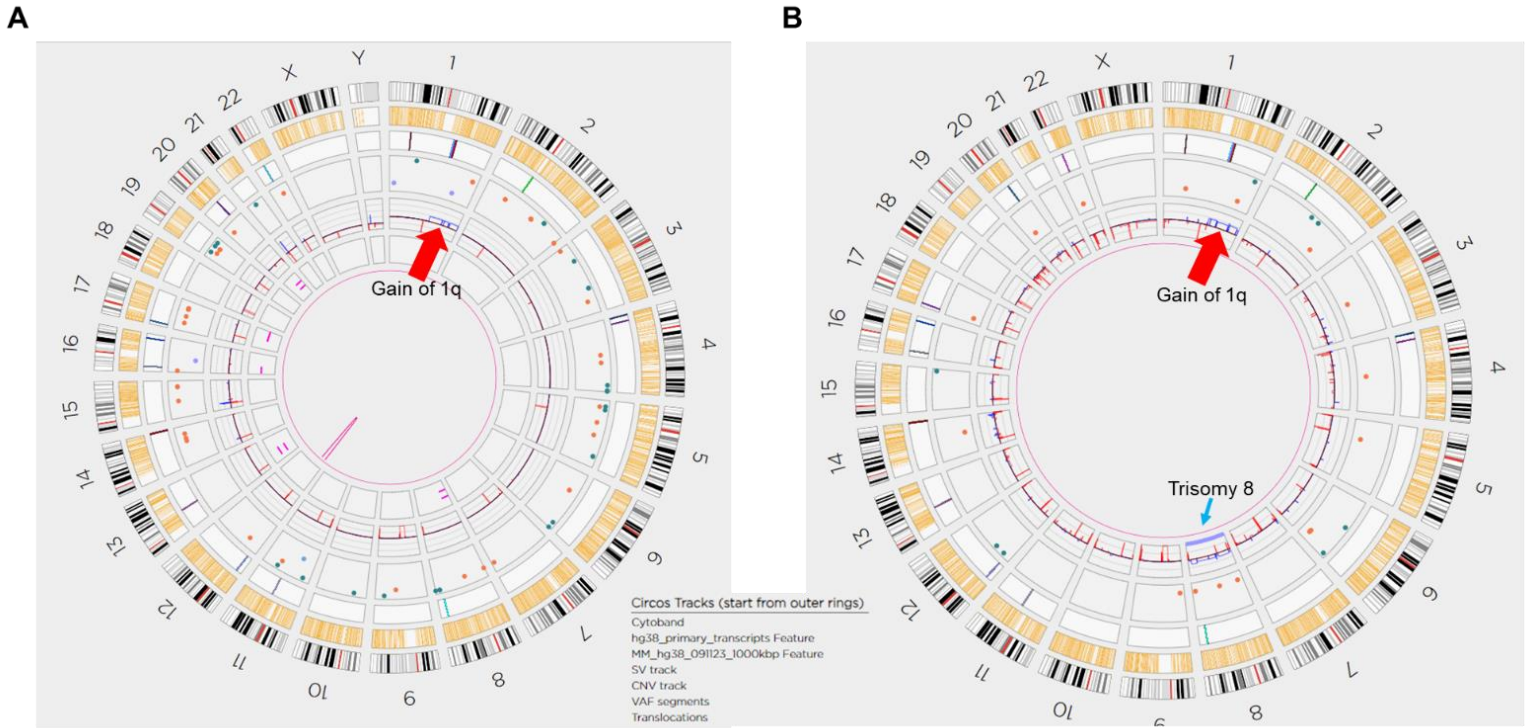

**Fig. S5 Characterization of 1q-JT by optical genome mapping.** A-B. Chromosomes 1 by optical genome mapping. A is from case 2 showed gain of 1q and no additional structural variants (SVs) involving chromosome 1. B is from case 11 showed gain of 1q, trisomy 8, and no additional SVs involving chromosome 1.

## The supplementary Methods

### Patients and Samples

This study includes 144 specimens from 46 patients with myeloid malignancies referred to The Johns Hopkins Hospital and The University of Texas MD Anderson Cancer Center from January 1, 2016, to December 31, 2023. These patients had routine diagnostic procedures, including morphologic evaluation, flow cytometry, fluorescence *in situ* hybridization (FISH), conventional chromosome analysis, and/or a targeted next-

generation sequencing (NGS) assay. Disease classification by standard hematopathology practice and delineated by the World Health Organization was based on clinical, morphologic, immunophenotypic, cytogenetic, and molecular genetic features.

### **Conventional Chromosome Analysis**

Conventional G-banded chromosome studies were performed using standard techniques. A minimum of 20 metaphase cells were analyzed from fresh bone marrow aspirate. The abnormal karyotypes were described using the International System for Human Cytogenetic Nomenclature (2020).

### **Targeted Next-generation sequencing (NGS) mutation assay**

NGS was performed in CLIA/CAP-certified molecular diagnostics labs on fresh bone marrow aspirate. For patients 1 through 21, DNA concentration was assessed using the Qubit fluorometer (Thermo Fisher Scientific, Waltham, MA). Library preparation was performed using Kapa Roche (Wilmington, MA) reagents, hybrid capture was performed using Integrated DNA Technologies probes (Coralville, IA), and products were sequenced using NovaSeq (paired-end technology; Illumina, San Diego, CA). The targeted NGS assay used 40,670 Integrated DNA Technologies probes. For a list of covered cancer genes in the targeted NGS assay, see [https://pathology.jhu.edu/jhml-services/assets/test-directory/Myeloma-Panel\\_GeneList\\_v1.0.pdf](https://pathology.jhu.edu/jhml-services/assets/test-directory/Myeloma-Panel_GeneList_v1.0.pdf). Analysis was performed using human reference sequence genome assembly hg19 (NCBI build



GRCh37/hg19). An in-house variant caller software (MDL VC 10) was used to generate gene variants/mutations from the targeted NGS data. For patients 22 to 46, NGS gene panel includes *ARID1A*, *ASXL1*, *ATM*, *B2M*, *BAZ2A*, *BCL10*, *BCL2*, *BCL6*, *BCL7A*, *BCOR*, *BIRC3*, *BLNK*, *BRAF*, *BRCC3*, *BTG1*, *BTG2*, *BTK*, *CARD11*, *CCND1*, *CCND3*, *CCR4*, *CCR7*, *CD274*, *CD28*, *CD58*, *CD79A*, *CD79B*, *CDKN2A*, *CDKN2B*, *CHD2*, *CHEK2*, *CIITA*, *CNOT3*, *CREBBP*, *CXCR4*, *DDX3X*, *DIS3*, *DNMT3A*, *DUSP2*, *EGR1*, *EGR2*, *ELF4*, *EP300*, *EWSR1*, *EZH2*, *FAM50A*, *FAS*, *FAT1*, *FBXW7*, *FGFR3*, *FOXO1*, *FYN*, *GNA13*, *GNAS*, *GPR183*, *H1-2*, *H1-4*, *H3C2*, *HRAS*, *HUWE1*, *HVNC1*, *ID3*, *IDH1*, *IDH2*, *IFNGR1*, *IGLL5*, *IKZF3*, *IL2RG*, *IRAK1*, *IRF4*, *IRF8*, *ITPKB*, *JAK1*, *JAK2*, *JAK3*, *KIT*, *KLF2*, *KLHL6*, *KMT2D*, *KRAS*, *LTB*, *LYN*, *MAP2K1*, *MAP3K14*, *MAPK1*, *MAX*, *MED12*, *MEF2B*, *MFHAS1*, *MYC*, *MYD88*, *NF1*, *NFKB2*, *NFKBIA*, *NFKBIE*, *NOTCH1*, *NOTCH2*, *NPM1*, *NRAS*, *NSD2*, *NXF1*, *P2RY8*, *PAX5*, *PIK3CA*, *PIK3R1*, *PIM1*, *PLCG1*, *PLCG2*, *PLEKHG5*, *POLE*, *POT1*, *PRDM1*, *PTEN*, *PTPN1*, *PTPN11*, *PTPRD*, *RASSF1*, *RB1*, *RBMX*, *RFTN1*, *RHOA*, *RIPK1*, *RPS15*, *RRAGC*, *RRAS*, *S1PR1*, *S1PR2*, *SAMHD1*, *SETD2*, *SF3B1*, *SGK1*, *SMARCA4*, *SMO*, *SOCS1*, *SOX11*, *SP140*, *SPEN*, *SRSF2*, *STAT3*, *STAT5B*, *STAT6*, *STK11*, *SYK*, *TBL1XR1*, *TCF3*, *TENT5C*, *TET2*, *TMEM30A*, *TNFAIP3*, *TNFRSF14*, *TP53*, *TRAF2*, *TRAF3*, *TRAF6*, *U2AF1*, *UBR5*, *VAV1*, *XPO1*, *ZFAT*, *ZMYM3*, and *ZRSR2*. NGS had coverage (>250x) and mutant allele frequency (>5%).

### **Whole-Genome SNP Microarray**

Single-nucleotide polymorphism (SNP) microarray was performed with DNA extracted from fresh bone marrow specimens by conventional methods (Qiacube). DNA

concentration was assessed using the Qubit fluorometer. The high-resolution microarray platform utilized was the Illumina Infinium CytoSNP-850K version 1.2 BeadChip, containing >850,000 markers (mean spacing, 3.5 kb). BeadChips were processed per manufacturer's guidelines and imaged with the Illumina iScan system. Data were analyzed with the CNV Partition 2.4.4.0 algorithm in GenomeStudio version 2010.3 (Illumina) and KaryoStudio version 1.4.3.0 (Illumina). B-allele frequency and logR signal intensities were used to examine and to identify potentially pathogenic regions of genomic imbalance. All analysis was performed using human reference genome assembly hg19 (GRCh37).

### **Optical genome mapping (OGM)**

OGM was performed on fresh biopsy/aspirates. G3.3 chips were utilized, and samples were processed on the Bionano Saphyr instrument (San Diego, CA, USA). OGM analysis was performed using the Rare Variant Analysis (RVA) and De Novo (DN) pipelines, utilizing the Bionano Access software v1.7.2. CNVs and SVs were manually determined independently by two genetic analysts. All analysis was performed using human reference genome assembly hg19 (GRCh37).
